# Supplementary material for: Luminescent photonic crystals with multi-functionality and tunability
Source: Royal Society of Chemistry journal article supplement (doi:10.1039/c6sc01703g), 2016-01-01
Supplement: c6sc01703g1.pdf [file c6sc01703g1.pdf]

***-Supporting Information-***

**Luminescent Photonic Crystals with Multi-functionality and Tunability**

Hong Wang,<sup>ab‡</sup> Xinggui Gu,<sup>ab‡</sup> Rongrong Hu,<sup>c</sup> Jacky W. Y. Lam,<sup>ab</sup> Deqing Zhang,<sup>d</sup> and Ben Zhong Tang<sup>abc\*</sup>

a HKUST-Shenzhen Research Institute, No. 9 Yuexing 1st RD, South Area, Hi-tech Park, Nanshan, Shenzhen 518057, China

b Department of Chemistry, Hong Kong Branch of Chinese National Engineering Research Center for Tissue Restoration & Reconstruction, Institute for Advanced Study, Institute of Molecular Functional Materials, Division of Biomedical Engineering, Division of Life Science and State Key Laboratory of Molecular Neuroscience, The Hong Kong University of Science & Technology, Clear Water Bay, Kowloon, Hong Kong

c Guangdong Innovative Research Team, SCUT-HKUST Joint Research Laboratory, State Key Laboratory of Luminescent Materials and Devices, South China University of Technology, Guangzhou 510640, China

d Beijing National Laboratory for Molecular Sciences, Key Laboratory of Organic Solids, Institute of Chemistry, Chinese Academy of Sciences, Beijing 100190, PR China

Email: [tangbenz@ust.hk](mailto:tangbenz@ust.hk)

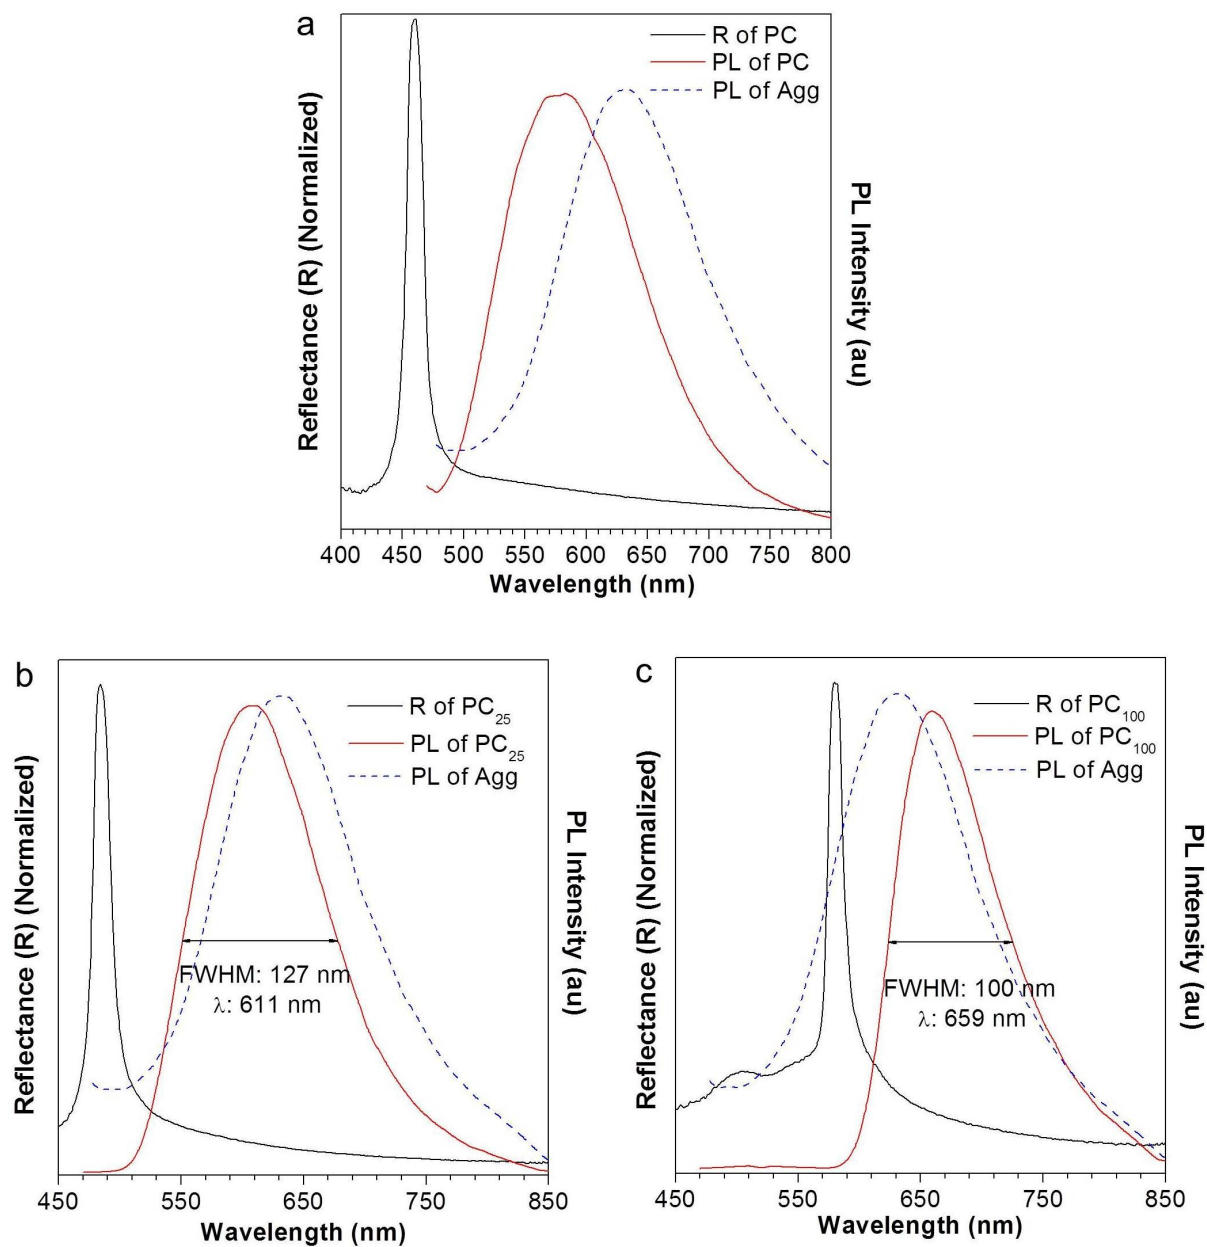

**Figure S1.** The fluorescence spectra of AIE1 NFTPE (blue) dissolved in THF : H<sub>2</sub>O = 1:9 solution, complemented with the fluorescence (red) and reflection spectra (black) of the NFTPE/PMMA photonic crystal with adding different amounts of water: (a) 0  $\mu$ L, (b) 25  $\mu$ L, and (c) 100  $\mu$ L, respectively.

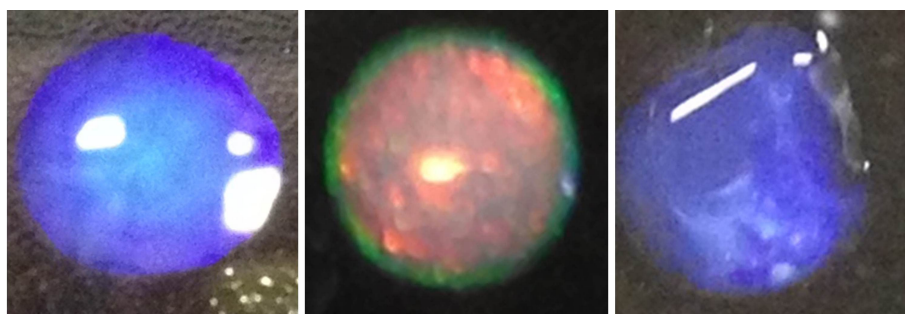

before adding water

after adding water

after centrifugation

**Figure S2.** Photographs of NFTEP/PMMA PC before adding water (left), after adding water (middle), and after centrifugation (right), respectively.

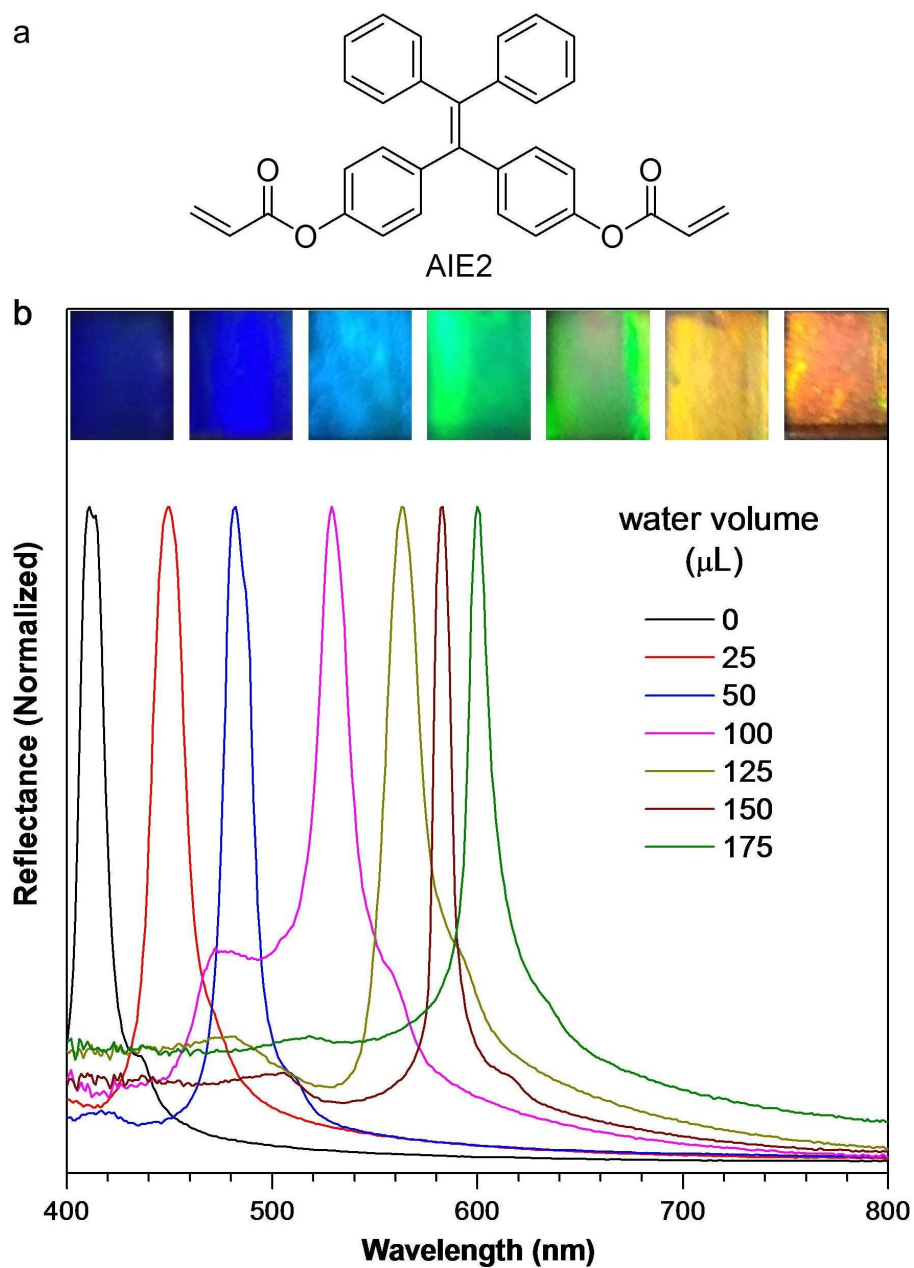

**Figure S3.** (a) Molecular structure of AIE2. (b) Photographs (inset) and corresponding reflection spectra of the AIE2/PMMA photonic crystal hydrogel with adding different amounts of water: 0, 25, 50, 100, 125, 150, and 175  $\mu\text{L}$  (by volume), respectively. The color changed from violet, blue, sky blue, green, yellow-green, yellow, to red, respectively.
